# Supplementary material for: Improving prediction of secondary structure, local backbone angles, and solvent accessible surface area of proteins by iterative deep learning
Source: PubMed Central journal article supplement (PMC4476419; doi:10.1038/srep11476), 2015-06-22
Supplement: srep11476-s1.pdf [file srep11476-s1.pdf]

**Supplementary material for “Improving prediction of secondary structure, local backbone angles, and solvent accessible surface area of proteins by iterative deep learning.”** *Rhys Heffernan, [a] Kuldip Paliwal, [a] James Lyons, [a] Abdollah*

*Dehzangi, [a,b] Alok Sharma, [b,c] Jihua Wang, [d] Abdul Sattar, [b,e] Yuedong Yang\* [f] and Yaoqi Zhou\* [d,f], [a]* Signal Processing Laboratory, School of Engineering, Griffith University, Brisbane, Australia, [b] Institute for Integrated and Intelligent Systems, Griffith University, Brisbane, Australia, [c] School of Engineering and Physics, University of the South Pacific, Private Mail Bag, Laucala Campus, Suva, Fiji, [d] Shandong Provincial Key Laboratory of Functional Macromolecular Biophysics, Dezhou University, Dezhou, Shandong, China, [e] National ICT Australia (NICTA), Brisbane, Australia, [f] Institute for Glycomics and School of Information and Communication Technique, Griffith University, Parklands Dr. Southport, QLD 4222, Australia., E-mail: yaoqi.zhou@griffith.edu.au or yuedong.yang@griffith.edu.au.

**List of 72 CASP 11 targets**

T0759, T0760, T0761, T0762, T0763, T0764, T0765, T0766, T0767, T0768, T0769, T0770, T0771, T0772, T0774, T0776, T0777, T0780, T0781, T0782, T0783, T0785, T0786, T0789, T0791, T0792, T0794, T0796, T0800, T0801, T0803, T0805, T0806, T0807, T0808, T0810, T0812, T0813, T0814, T0815, T0816, T0817, T0818, T0819, T0820, T0821, T0822, T0823, T0824, T0827, T0829, T0830, T0831, T0832, T0833, T0834, T0835, T0836, T0837, T0838, T0843, T0845, T0847, T0848, T0849, T0851, T0852, T0853, T0854, T0855, T0856, T0857.
